# Supplementary material
Source: publisher figshare collection journal article supplement (https://karger.figshare.com/ndownloader/files/13627265)
Supplement: Supplementary file 1 [file 13627265]

**Supplementary Quality of Life Questionnaire**

**(To be returned with the two other questionnaires (SF-36 and 15D))**

Name:________________________________________________ DOB: ____________________

1) Are you:

not married _____

living with someone _____

married _____

divorced _____

widowed _____

2) What is your education?

Elementary school _____

Vocational school _____

High school _____

Professional education _____

University degree _____

Other ____

3) Current medication

Brand name and dose:

______________________________________________________________________________________________________________________________________________________________________________________________________________________________________________________________________________________________________________________________________________________________________________________________________________________________________________________________________________________________________________________________

_____________________________________________________________________________________

4) When were you diagnosed with neuroendocrine tumor? Year_________

5) Do you have diarrhea? No____________ Yes ___ days per week

6) How frequent are your bowel movements? _______________ per/day

7) Do you have flush symptoms? If yes, how often?_______________________

8) Do you have abdominal pain? _____________No____________ Yes ___ times per/day

9) Date ____________

10) You are welcome to give additional information or comments here:
